# Supplementary material
Source: publisher site journal article supplement (https://www.dovepress.com/article/447606)
Supplement: Supplementary file 1 [file get_supplementary_file.php]

### Appendix 1 – Topic Guide

| **Question** | **Prompts** |
| --- | --- |
| TOPIC: GOALSETTING   1. How do you set goals?    1. *COPM or other tool?* 2. Which kind of goals are set? | - Phases   1. Identifying goals   2. Prioritizing goals   3. Setting goals   4. Evaluating goals - Challenges - Best practices/ tricks - (I)ADL - Other meaningful activities - Other goals |
| *Give a summary of what was just discussed and ask for any additions/nuances* (± 5 min) | | |
| TOPIC: TREATMENT   1. How are clients’ goals reached?    1. *Specific (standardized) interventions/programs?* | - Which interventions? - Challenges - Best practices/ tricks |
| *Give a summary of what was just discussed and ask for any additions/nuances (± 5 min)* | | |
| TOPIC: INTERDISCIPLINARY COLLABORATION   1. How do you reach clients’ goals?    1. *Other professions involved besides dedicated reablement team?* | - Who does what? - Coordination - Collaboration & communication - Keeping reablement philosophy in focus - Challenges - Best practices/ tricks |
| *Give a summary of what was just discussed and ask for any additions/nuances (± 5 min)* | | |
| TOPIC: INVOLVEMENT CLIENT & FAMILY   1. To what extent are clients and family involved as active partners? | - Shared-decision making   - Goal-setting   - Treatment - Doing *with…* instead doing *for…* - Family support - Challenges - Best practices/ tricks |
| *Give a summary of what was just discussed and ask for any additions/nuances (± 5 min)* | | |
